# Supplementary material for: Microscopic and Spectroscopic Imaging and Thermal Analysis of Acrylates, Silicones and Active Pharmaceutical Ingredients in Adhesive Transdermal Patches
Source: MDPI journal article supplement (doi:10.3390/polym14142888), 2022-07-16
Supplement: s1 [file s1]

## SUPPLEMENTARY MATERIAL

### FTIR spectroscopy

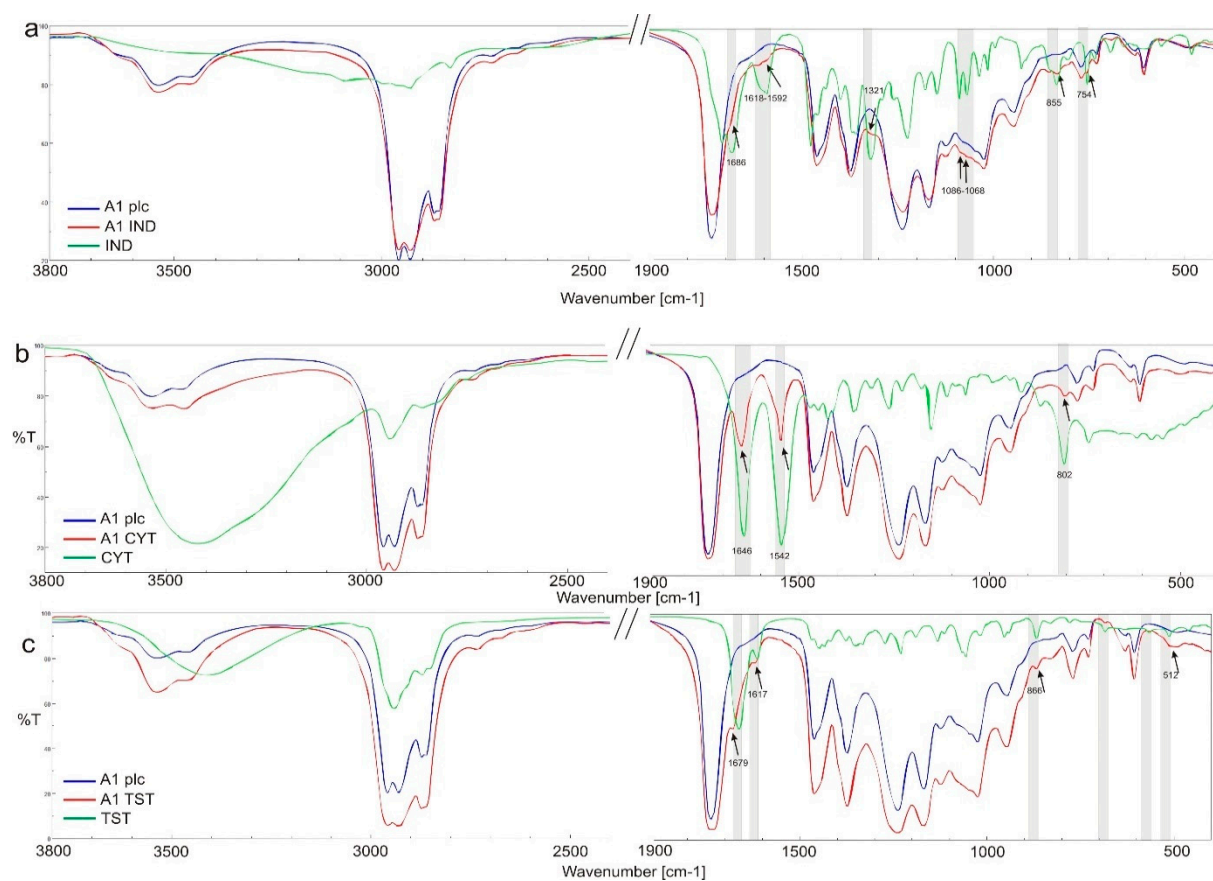

**Figure S1.** Infrared spectra of the acrylic patches A1 – placebo and drug loaded: a) IND, b) CYT, c) TST. The grey bands mark differences or similarities between spectra of the placebo polymers and API's characteristic band.

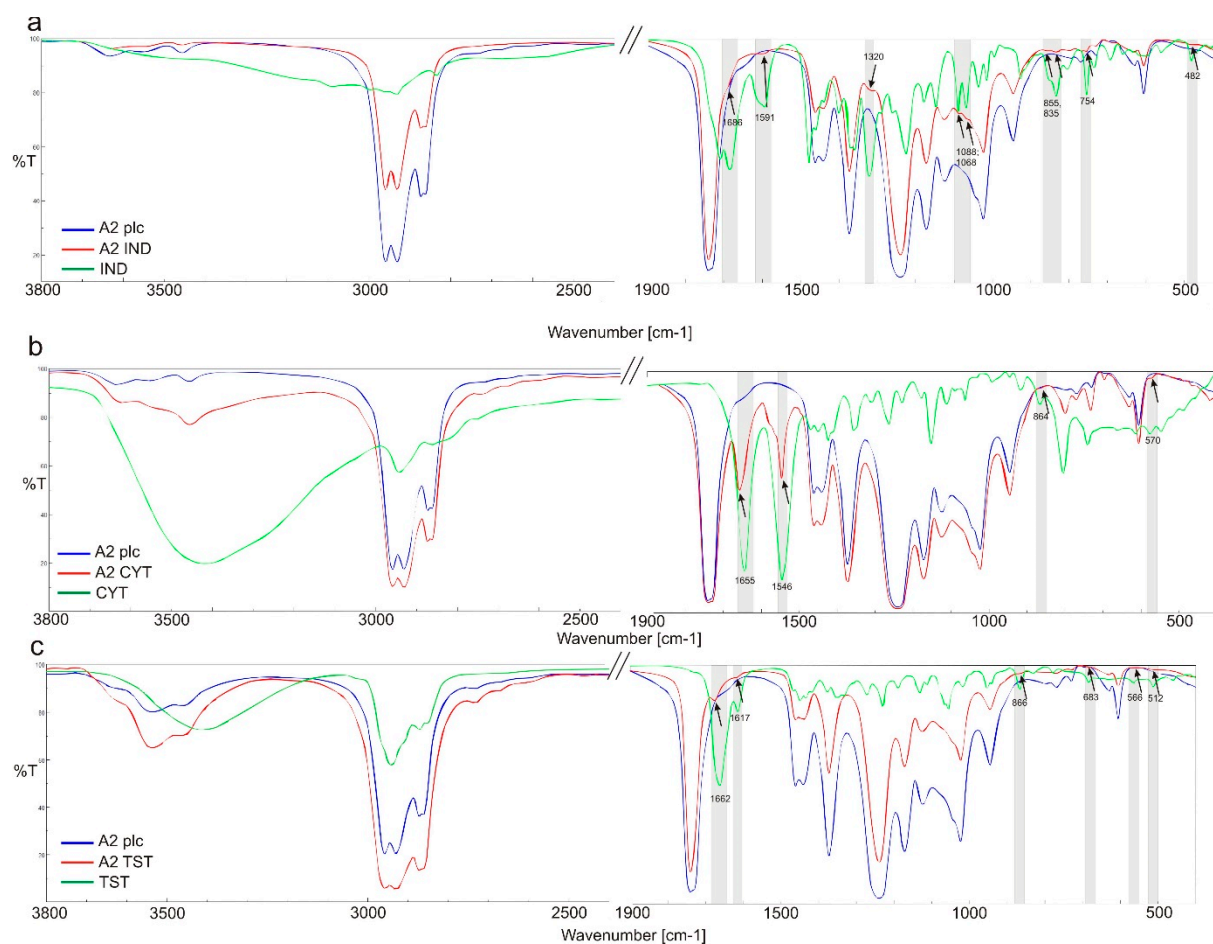

**Figure S2.** Infrared spectra of the acrylic patches A2 – placebo and drug loaded: a) IND, b) CYT, c) TST. The grey bands mark differences or similarities between spectra of the placebo polymers and API's characteristic band.

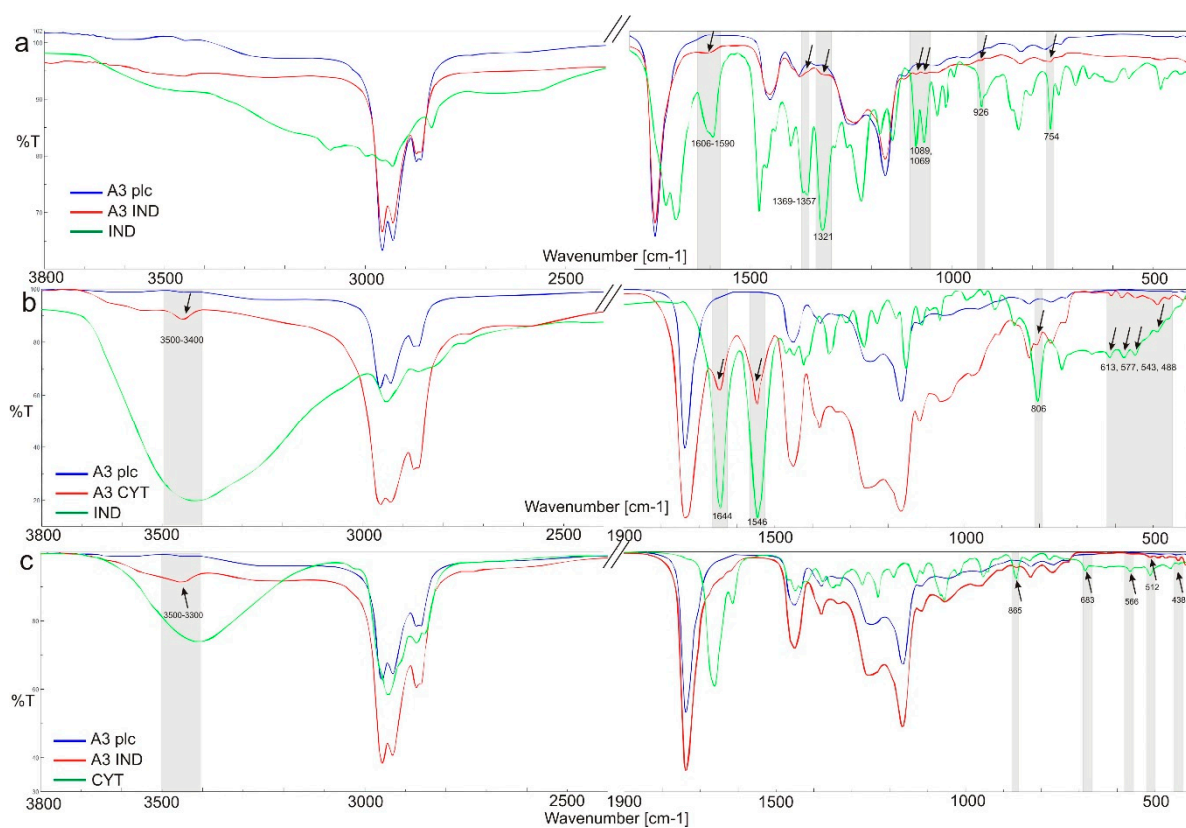

**Figure S3.** Infrared spectra of the acrylic patches A3 – placebo and drug loaded: a) IND, b) CYT, c) TST. The grey bands mark differences or similarities between spectra of the placebo polymers and API's characteristic band.

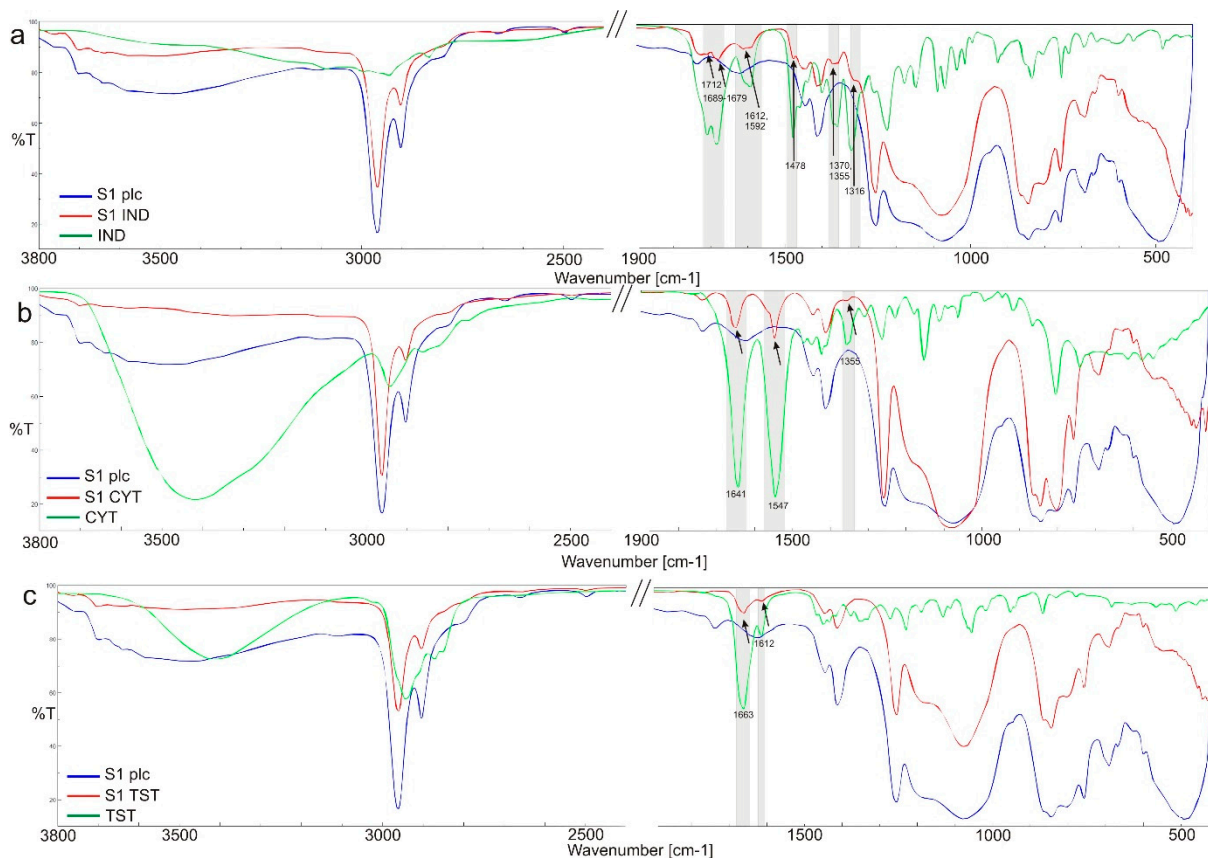

**Figure S4.** Infrared spectra of the silicone patches S1 – placebo and drug loaded: a) IND, b) CYT, c) TST. The grey bands mark differences or similarities between spectra of the placebo polymers and API's characteristic band.

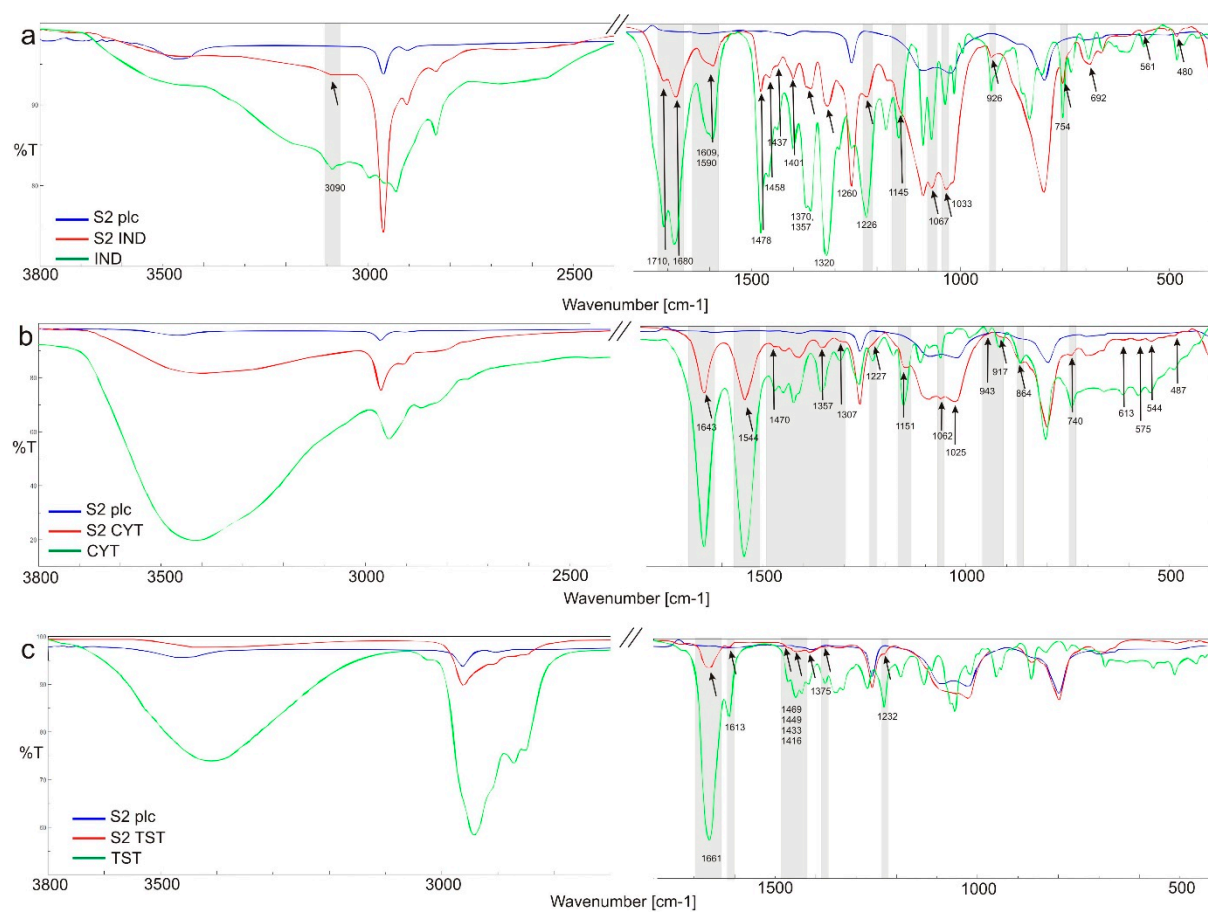

**Figure S5.** Infrared spectra of the silicone patches S2 – placebo and drug loaded: a) IND, b) CYT, c) TST. The grey bands mark differences or similarities between spectra of the placebo polymers and API's characteristic band.

## Raman Spectroscopy

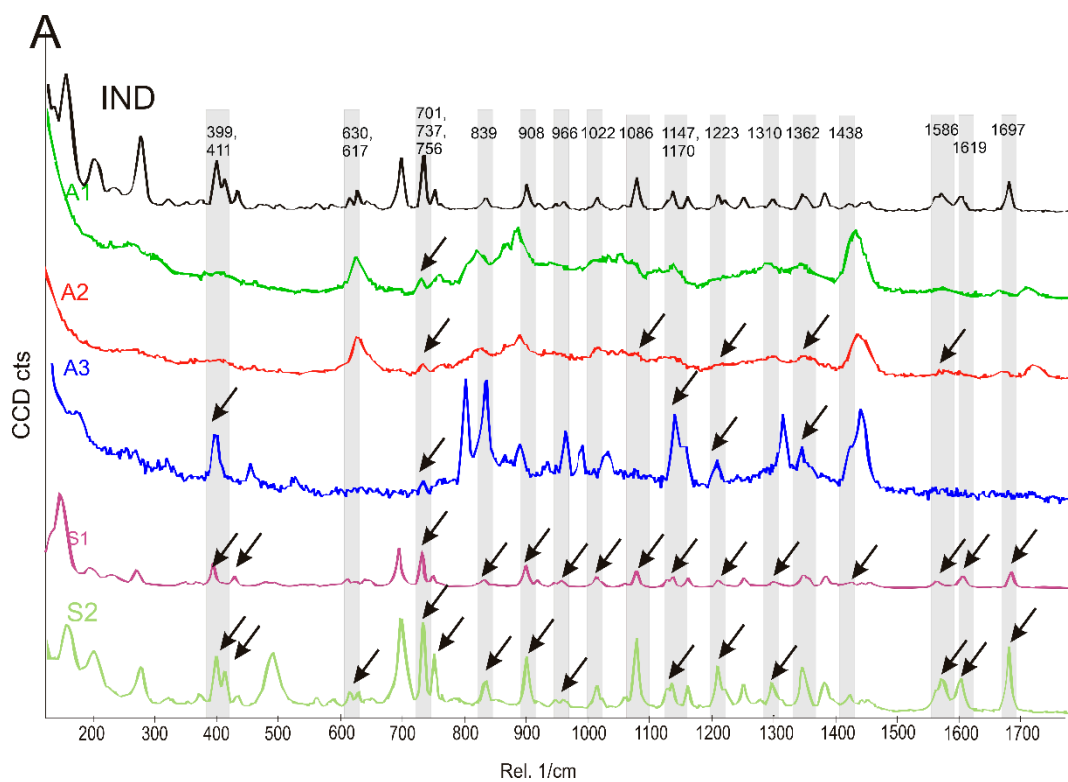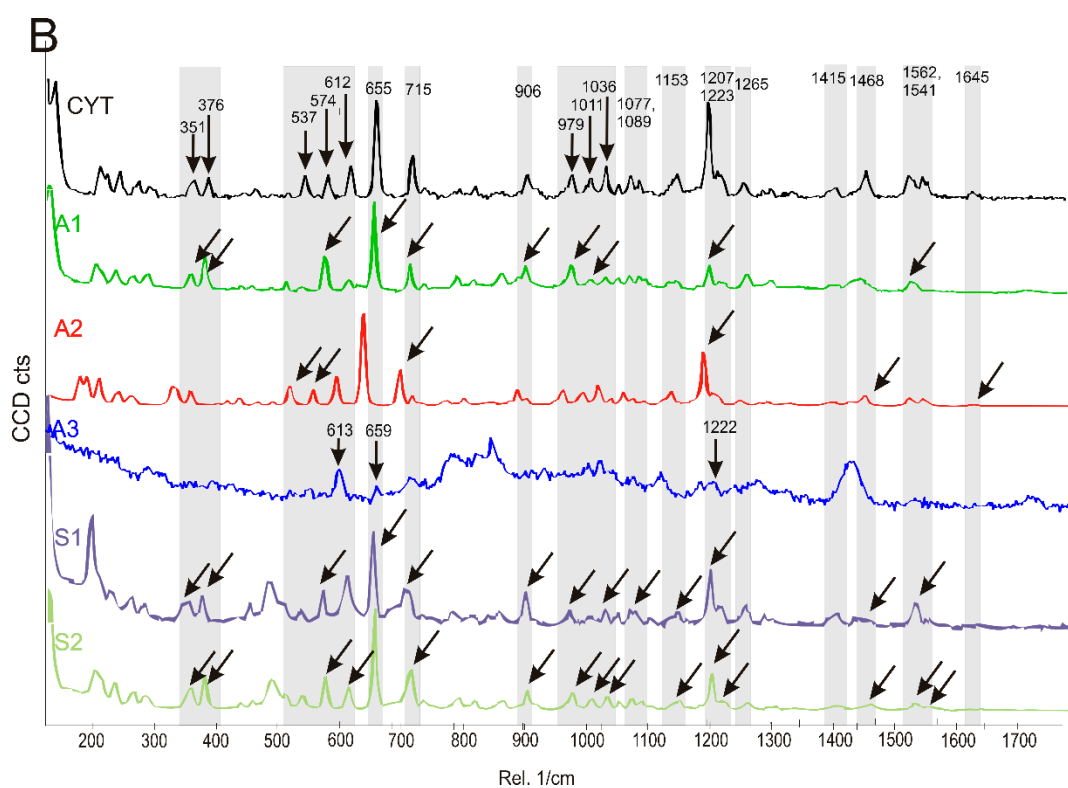

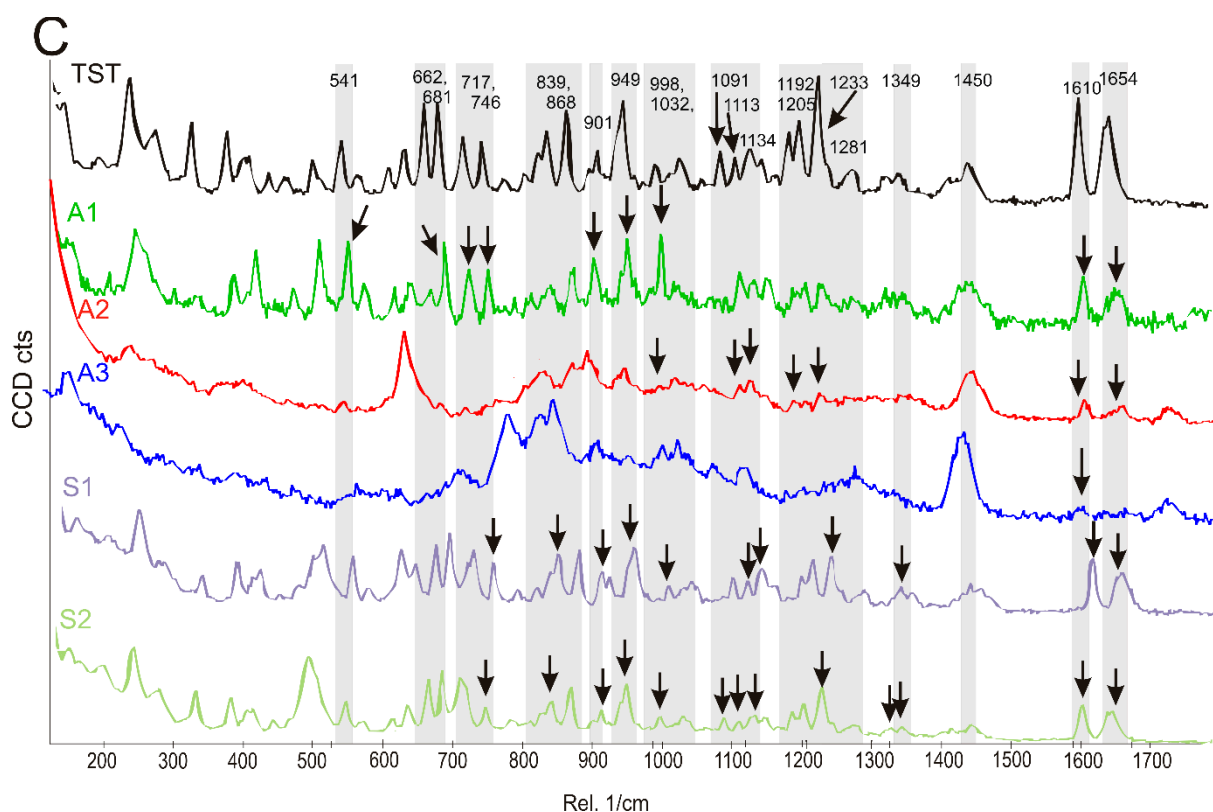

**Figure S6.** Raman spectra of polymeric patches with A) indomethacin, B) cytisine, C) testosterone. Arrows indicate the characteristic API bands described also rectangular gray stripe.

**Table S1.** The effect of placebo patches on the enthalpy values of endotherms of API – enthalpy is proportional to the amount of API but 20-50 times smaller than calculated for the corresponding amount of pure API (with no placebo patch placed in the same pan).

| API                              | IND    |        | CYT    |        |
|----------------------------------|--------|--------|--------|--------|
| Mass                             | 0.5 mg | 1.0 mg | 0.5 mg | 1.0 mg |
| Pure                             | -68.9  | -106.1 | -73.2  | -141.6 |
| in the presence of placebo patch |        |        |        |        |
| A1 (10 mg)                       |        |        | -4.12  | -11.78 |
| A2 (10 mg)                       | -1.3   | -2.5   | -5.20  | -10.78 |
| A3 (10 mg)                       |        |        | -4.08  | -12.38 |
| S2 (10 mg)                       | -3.4   | -6.2   | -5.79  | -11.89 |
| S2 (1 mg)                        |        |        |        | -58.68 |
